# Supplementary material
Source: MDPI journal article supplement (https://www.mdpi.com/2543-6031/92/3/21)
Supplement: s1 [file s1]

Supplemental information for:

## **RNA Polymerase Inhibitor Enisamium for Treatment of Moderate COVID-19 Patients: A Randomized, Placebo-Controlled, Multicenter, Double-Blind Phase 3 Clinical Trial**

**Table S1: Patient inclusion criteria**

| <b>Number</b> | <b>Inclusion criterion</b>                                                                                                                                                                                                                                    |
|---------------|---------------------------------------------------------------------------------------------------------------------------------------------------------------------------------------------------------------------------------------------------------------|
| 1             | Willing and able to provide written informed consent                                                                                                                                                                                                          |
| 2             | Aged $\geq 18$ years                                                                                                                                                                                                                                          |
| 3             | SARS-CoV-2 infection confirmed by PCR $\leq 4$ days before randomization (test should be performed in laboratories qualified for this purpose by MOH of Ukraine; confirmation of the already established diagnosis in the central laboratory is not required) |
| 4             | Currently hospitalized due to SARS-CoV-2 infection with fever defined as body temperature $\geq 37.8$ °C                                                                                                                                                      |
| 5             | Severity Rating Scale for Clinical Status Patient state in Covid-19: score 4 (See Table 1). Note: changed after 1 <sup>st</sup> interim analysis (before also score 5 was allowed)                                                                            |

**Table S2: Patient exclusion criteria**

| <b>Number</b> | <b>Exclusion criterion</b>                                                                                                                                                                               |
|---------------|----------------------------------------------------------------------------------------------------------------------------------------------------------------------------------------------------------|
| 1             | Concurrent treatment with other medicine with actual or possible direct-acting antiviral activity against SARS-CoV-2 is prohibited <24 hours prior to the start of enisamium or placebo treatment.       |
| 2             | Requiring mechanical ventilation at screening or it is expected within 24 hours after inclusion.                                                                                                         |
| 3             | Expected survival time <72 hours for any reason.                                                                                                                                                         |
| 4             | Positive pregnancy test.                                                                                                                                                                                 |
| 5             | Breastfeeding.                                                                                                                                                                                           |
| 6*            | Presence of renal dysfunction defined as eGFR <60 mL/min, total bilirubin $\geq 2.0$ mg/dL, TSH outside normal range and / or ASAT / ALAT above threefold upper limit of normal range.                   |
| 7             | Known hypersensitivity to the trial drug, the metabolites, or formulation excipient.                                                                                                                     |
| 8             | History or presence of drug or alcohol abuse.                                                                                                                                                            |
| 9             | History or presence of diseases of thyroid gland.                                                                                                                                                        |
| 10            | Parallel participation in another clinical trial with an investigational product, participation in a clinical trial within less than 6 weeks prior to visit 1.                                           |
| 11            | Known to be or suspected of being unable to comply with the trial protocol (e.g., no permanent address, history of drug abuse, known to be non-compliant or presenting an unstable psychiatric history). |
| 12            | Legal incapacity and / or other circumstances render the subject unable to understand the trial's nature, scope, and possible impact.                                                                    |
| 13            | Subject in custody by juridical or official order.                                                                                                                                                       |

|    |                                                                                                                                                                                                      |
|----|------------------------------------------------------------------------------------------------------------------------------------------------------------------------------------------------------|
| 14 | Subject who has difficulties in understanding the language (Ukrainian) in which the subject information (informed consent form) is given.                                                            |
| 15 | Subjects who are members of the staff of the trial center, staff of the sponsor or the clinical research organization (CRO), the investigator him- / herself or close relatives of the investigator. |

\*These details became known from patient's medical history as patient was started on treatment. It was then decided to discontinue the patient from the clinical trial and censor any data.

**Table S3. Treatment with glucocorticosteroids by study group.**

| Characteristic                | All<br>N=285  | Enisamium<br>N=142 | Placebo<br>N=143 |
|-------------------------------|---------------|--------------------|------------------|
| Concomitant therapy — no. (%) |               |                    |                  |
| Glucocorticosteroids          | 200<br>(70.2) | 97 (68.3)          | 103 (72.0)       |

**Table S4. Time from onset of symptoms to randomization.**

| Characteristic                                                            | All<br>N=285 | Enisamium<br>N=142 | Placebo<br>N=143 |
|---------------------------------------------------------------------------|--------------|--------------------|------------------|
| Median time (IQR) <sup>a)</sup> from symptom onset to randomization, days | 8 (6 – 12)   | 8 (5 – 10)         | 7 (5 – 9)        |

<sup>a)</sup> IQR denotes interquartile range.

**Table S5. Data processing summary**

| Age categories | Total N | N of Events | Censored |      |
|----------------|---------|-------------|----------|------|
|                |         |             | N        | %    |
| <40 years      | 32      | 29          | 3        | 9.4  |
| 40 – <65 years | 174     | 151         | 23       | 13.2 |
| >= 65 years    | 79      | 66          | 13       | 16.5 |
| Total          | 285     | 246         | 39       | 13.7 |

**Table S6 – Medians and means of the time to clinical improvement**

| Age categories | Mean <sup>a</sup> |            |             |             | Median   |            |             |             |
|----------------|-------------------|------------|-------------|-------------|----------|------------|-------------|-------------|
|                | Estimate          | Std. Error | 95% CI      |             | Estimate | Std. Error | 95% CI      |             |
|                |                   |            | Lower Bound | Upper Bound |          |            | Lower Bound | Upper Bound |
| <40 years      | 9.24              | 0.44       | 8.37        | 10.11       | 9        | 0.52       | 7.98        | 10.02       |
| 40 – <65 years | 11.12             | 0.32       | 10.49       | 11.74       | 11       | 0.27       | 10.46       | 11.54       |

|             |       |      |       |       |    |      |      |       |
|-------------|-------|------|-------|-------|----|------|------|-------|
| >= 65 years | 12.28 | 0.61 | 11.08 | 13.48 | 11 | 0.65 | 9.73 | 12.27 |
| Total       | 11.22 | 0.27 | 10.69 | 11.74 | 10 | 0.25 | 9.52 | 10.48 |

<sup>a</sup> Estimation is limited to the largest survival time if it is censored.

**Table S7. The results of applying the Log Rank test to assess the differences between age categories at the stage of "blind" data review**

| Test                  | Chi-Square | df | p-value |
|-----------------------|------------|----|---------|
| Log Rank (Mantel-Cox) | 14.674     | 2  | 0.0007  |

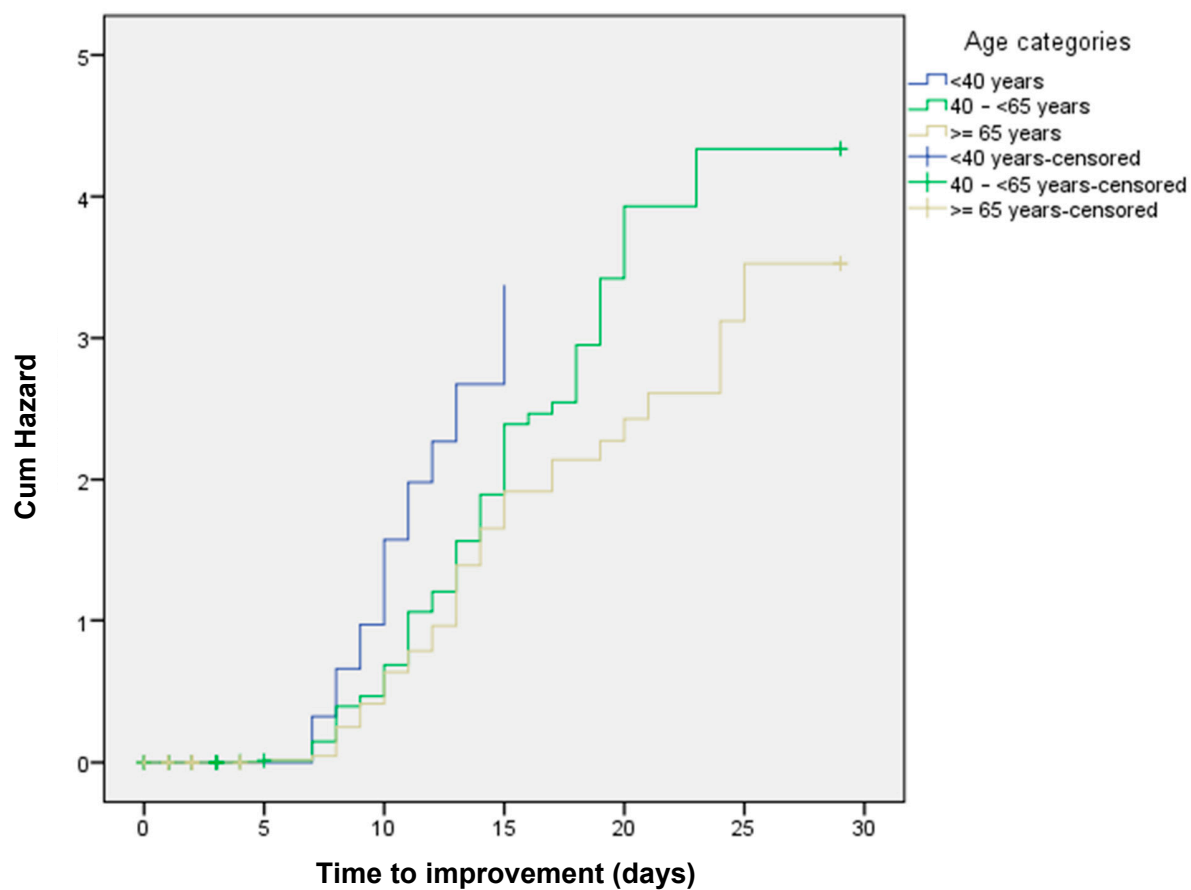

**Figure S1.** Risk assessments are more likely to achieve clinical improvement (increase in SR scores by 2 points) for patients depending on age.

**Table S8. Results for the secondary endpoints by study group.**

| Variable                                                                                       | Group     | Statistics |          |           |           |            |            | P-value<br>(one-sided) |
|------------------------------------------------------------------------------------------------|-----------|------------|----------|-----------|-----------|------------|------------|------------------------|
|                                                                                                |           | <i>n</i>   | <i>M</i> | <i>Me</i> | <i>SD</i> | <i>MIN</i> | <i>MAX</i> |                        |
| The sum of the scores of the subject's condition from the 2nd to the 15th day (SSR-15), points | Placebo   | 143        | 70.80    | 72        | 11.98     | 22         | 90         | 0.079                  |
|                                                                                                | Enisamium | 142        | 72.94    | 75.5      | 11.09     | 47         | 91         |                        |
| The sum of the scores of the subject's condition from the 2nd to the 29th day (SSR-29), points | Placebo   | 143        | 170.35   | 181       | 31.88     | 36         | 206        | 0.037                  |
|                                                                                                | Enisamium | 142        | 175.85   | 186       | 26.71     | 112        | 203        |                        |
| Assessment of the subject's condition on the 15th day (SR-15), points                          | Placebo   | 143        | 6.64     | 7         | 1.651     | 1          | 8          | 0.137                  |
|                                                                                                | Enisamium | 142        | 6.85     | 8         | 1.48      | 4          | 8          |                        |
| Assessment of the condition of the subject on the 29th day (SR-29), points                     | Placebo   | 143        | 7.27     | 8         | 1.589     | 1          | 8          | 0.109                  |
|                                                                                                | Enisamium | 142        | 7.46     | 8         | 1.303     | 4          | 8          |                        |
| Days alive and out of Hospital until Day 15 (DAOH-14), days                                    | Placebo   | 143        | 2.85     | 3         | 2.551     | 0          | 9          | 0.112                  |
|                                                                                                | Enisamium | 142        | 3.25     | 3         | 2.740     | 0          | 10         |                        |
| Estimate of global efficacy by investigator, scores                                            | Placebo   | 124        | 0.99     | 1         | 0.393     | 0          | 3          | 0.168                  |
|                                                                                                | Enisamium | 123        | 0.93     | 1         | 0.248     | 0          | 1          |                        |
| Estimate of global efficacy by subjects, scores                                                | Placebo   | 124        | 0.90     | 1         | 0.484     | 0          | 3          | 0.374                  |
|                                                                                                | Enisamium | 123        | 0.86     | 1         | 0.347     | 0          | 1          |                        |

**Table S9. Results for secondary endpoints by time to event.**

| Variable                                                                   | Group     | n   | Median   |            |             |             | P-value<br>(one-sided) |
|----------------------------------------------------------------------------|-----------|-----|----------|------------|-------------|-------------|------------------------|
|                                                                            |           |     | Estimate | Std. Error | 95% CI      |             |                        |
|                                                                            |           |     |          |            | Lower Bound | Upper Bound |                        |
| Time from first symptoms to discharge, days                                | Placebo   | 143 | 18       | 0.30       | 17.41       | 18.59       | 0.230                  |
|                                                                            | Enisamium | 142 | 18       | 0.52       | 16.98       | 19.02       |                        |
|                                                                            | Total     | 285 | 18       | 0.27       | 17.47       | 18.53       |                        |
| The time from the randomization to the negative RT-qPCR test results, days | Placebo   | 143 | 10       | 1.50       | 7.07        | 12.93       | 0.190                  |
|                                                                            | Enisamium | 142 | 8        | 0.91       | 6.23        | 9.77        |                        |
|                                                                            | Total     | 285 | 10       | 0.84       | 8.35        | 11.65       |                        |
| Time to Clinical Recovery (TTCR)*, days                                    | Placebo   | 143 | 10       | 0.29       | 9.44        | 10.56       | 0.039                  |
|                                                                            | Enisamium | 142 | 9        | 0.41       | 8.20        | 9.80        |                        |
|                                                                            | Total     | 285 | 10       | 0.28       | 9.45        | 10.55       |                        |
| Time to Recovery (TTR)**, days                                             | Placebo   | 143 | 11       | 0.32       | 10.37       | 11.63       | 0.009                  |
|                                                                            | Enisamium | 142 | 10       | 0.34       | 9.33        | 10.67       |                        |
|                                                                            | Total     | 285 | 10       | 0.25       | 9.52        | 10.48       |                        |
| Time to discontinuation of oxygen therapy, days                            | Placebo   | 143 | 6        | 0.34       | 5.34        | 6.66        | 0.092                  |
|                                                                            | Enisamium | 142 | 6        | 0.30       | 5.41        | 6.59        |                        |
|                                                                            | Total     | 285 | 6        | 0.23       | 5.56        | 6.44        |                        |

\*Time to Clinical Recovery (TTCR) is the time in days from randomization (active or placebo) until normalization of fever, respiratory rate, oxygen saturation, and cough, for at least 48 hours.

\*\*Time to Recovery (TTR) is the time in days from randomization to when the subject's rating on the severity scale has improved from 4 to 6, 7 or 8.

**Table S10. Summary results for symptoms severity\*.**

| Variable                               | Category         | Placebo<br>(N = 142) |      | Enisamium<br>(N = 142) |      | P-<br>value<br>(one-<br>sided) |
|----------------------------------------|------------------|----------------------|------|------------------------|------|--------------------------------|
|                                        |                  | n                    | %    | n                      | %    |                                |
| Cough severity on day 2                | Reduced severity | 10                   | 7.0  | 12                     | 8.5  | 0.412                          |
| Cough severity on day 3                | Reduced severity | 15                   | 10.5 | 31                     | 21.8 | 0.008                          |
| Cough severity on day 4                | Reduced severity | 30                   | 21.0 | 48                     | 33.8 | 0.012                          |
| Cough severity on day 5                | Reduced severity | 46                   | 32.2 | 68                     | 47.8 | 0.005                          |
| Cough severity on day 6                | Reduced severity | 69                   | 48.6 | 76                     | 53.5 | 0.238                          |
| Cough severity on day 7                | Reduced severity | 78                   | 54.9 | 85                     | 59.9 | 0.236                          |
| Cough severity on day 8                | Reduced severity | 83                   | 58.5 | 95                     | 66.9 | 0.089                          |
| Cough severity on day 9                | Reduced severity | 89                   | 62.7 | 97                     | 68.3 | 0.191                          |
| Cough severity on day 10               | Reduced severity | 92                   | 64.8 | 99                     | 69.7 | 0.224                          |
| Cough severity on day 11               | Reduced severity | 95                   | 66.9 | 98                     | 69.0 | 0.400                          |
| Cough severity on day 12               | Reduced severity | 96                   | 67.6 | 101                    | 71.1 | 0.303                          |
| Cough severity on day 13               | Reduced severity | 97                   | 68.3 | 105                    | 73.9 | 0.180                          |
| Cough severity on day 14               | Reduced severity | 98                   | 69.0 | 108                    | 76.1 | 0.116                          |
| Cough severity on day 15               | Reduced severity | 101                  | 71.1 | 108                    | 76.1 | 0.210                          |
| Shortness of breath severity on day 2  | Reduced severity | 14                   | 9.9  | 12                     | 8.5  | 0.419                          |
| Shortness of breath severity on day 3  | Reduced severity | 36                   | 25.4 | 34                     | 23.9 | 0.445                          |
| Shortness of breath severity on day 4  | Reduced severity | 69                   | 48.6 | 62                     | 43.7 | 0.238                          |
| Shortness of breath severity on day 5  | Reduced severity | 82                   | 57.7 | 86                     | 60.6 | 0.359                          |
| Shortness of breath severity on day 6  | Reduced severity | 95                   | 66.9 | 97                     | 68.3 | 0.450                          |
| Shortness of breath severity on day 7  | Reduced severity | 98                   | 69.0 | 104                    | 73.2 | 0.256                          |
| Shortness of breath severity on day 8  | Reduced severity | 104                  | 73.2 | 113                    | 79.6 | 0.132                          |
| Shortness of breath severity on day 9  | Reduced severity | 107                  | 75.4 | 114                    | 80.3 | 0.196                          |
| Shortness of breath severity on day 10 | Reduced severity | 111                  | 78.2 | 115                    | 81.0 | 0.330                          |
| Shortness of breath severity on day 11 | Reduced severity | 114                  | 80.3 | 117                    | 82.4 | 0.380                          |
| Shortness of breath severity on day 12 | Reduced severity | 113                  | 79.6 | 121                    | 85.2 | 0.138                          |
| Shortness of breath severity on day 13 | Reduced severity | 117                  | 82.4 | 125                    | 88.0 | 0.121                          |
| Shortness of breath severity on day 14 | Reduced severity | 117                  | 82.4 | 126                    | 88.7 | 0.088                          |
| Shortness of breath severity on day 15 | Reduced severity | 117                  | 82.4 | 127                    | 89.4 | 0.062                          |
| Fatigue severity on day 2              | Reduced severity | 17                   | 12.0 | 13                     | 9.2  | 0.282                          |
| Fatigue severity on day 3              | Reduced severity | 29                   | 20.4 | 37                     | 26.1 | 0.163                          |

| Variable                      | Category         | Placebo<br>(N = 142) |      | Enisamium<br>(N = 142) |      | P-<br>value<br>(one-<br>sided) |
|-------------------------------|------------------|----------------------|------|------------------------|------|--------------------------------|
|                               |                  | n                    | %    | n                      | %    |                                |
| Fatigue severity on day 4     | Reduced severity | 51                   | 35.9 | 58                     | 40.8 | 0.232                          |
| Fatigue severity on day 5     | Reduced severity | 64                   | 45.1 | 74                     | 52.1 | 0.143                          |
| Fatigue severity on day 6     | Reduced severity | 84                   | 59.2 | 85                     | 59.9 | 0.500                          |
| Fatigue severity on day 7     | Reduced severity | 94                   | 66.2 | 96                     | 67.6 | 0.450                          |
| Fatigue severity on day 8     | Reduced severity | 101                  | 71.1 | 105                    | 73.9 | 0.345                          |
| Fatigue severity on day 9     | Reduced severity | 107                  | 75.4 | 109                    | 76.8 | 0.445                          |
| Fatigue severity on day 10    | Reduced severity | 114                  | 80.3 | 109                    | 76.8 | 0.282                          |
| Fatigue severity on day 11    | Reduced severity | 117                  | 82.4 | 110                    | 77.5 | 0.277                          |
| Fatigue severity on day 12    | Reduced severity | 117                  | 82.4 | 114                    | 80.3 | 0.380                          |
| Fatigue severity on day 13    | Reduced severity | 120                  | 84.5 | 117                    | 82.4 | 0.375                          |
| Fatigue severity on day 14    | Reduced severity | 122                  | 85.9 | 119                    | 83.8 | 0.370                          |
| Fatigue severity on day 15    | Reduced severity | 122                  | 85.9 | 120                    | 84.5 | 0.434                          |
| Rhinorrhea severity on day 2  | Reduced severity | 8                    | 5.6  | 5                      | 3.5  | 0.286                          |
| Rhinorrhea severity on day 3  | Reduced severity | 13                   | 9.2  | 10                     | 7.0  | 0.332                          |
| Rhinorrhea severity on day 4  | Reduced severity | 15                   | 10.6 | 13                     | 9.2  | 0.421                          |
| Rhinorrhea severity on day 5  | Reduced severity | 17                   | 12.0 | 13                     | 9.2  | 0.282                          |
| Rhinorrhea severity on day 6  | Reduced severity | 18                   | 12.7 | 12                     | 8.5  | 0.167                          |
| Rhinorrhea severity on day 7  | Reduced severity | 18                   | 12.7 | 14                     | 9.9  | 0.287                          |
| Rhinorrhea severity on day 8  | Reduced severity | 18                   | 12.7 | 14                     | 9.9  | 0.287                          |
| Rhinorrhea severity on day 9  | Reduced severity | 19                   | 13.4 | 14                     | 9.9  | 0.230                          |
| Rhinorrhea severity on day 10 | Reduced severity | 19                   | 13.4 | 14                     | 9.9  | 0.230                          |
| Rhinorrhea severity on day 11 | Reduced severity | 19                   | 13.4 | 14                     | 9.9  | 0.230                          |
| Rhinorrhea severity on day 12 | Reduced severity | 19                   | 13.4 | 14                     | 9.9  | 0.230                          |
| Rhinorrhea severity on day 13 | Reduced severity | 19                   | 13.4 | 14                     | 9.9  | 0.230                          |
| Rhinorrhea severity on day 14 | Reduced severity | 19                   | 13.4 | 14                     | 9.9  | 0.230                          |
| Rhinorrhea severity on day 15 | Reduced severity | 19                   | 13.4 | 14                     | 9.9  | 0.230                          |
| Headache severity on day 2    | Reduced severity | 21                   | 14.8 | 31                     | 21.8 | 0.083                          |
| Headache severity on day 3    | Reduced severity | 38                   | 26.8 | 50                     | 35.2 | 0.079                          |
| Headache severity on day 4    | Reduced severity | 57                   | 40.1 | 65                     | 45.8 | 0.201                          |
| Headache severity on day 5    | Reduced severity | 63                   | 44.4 | 69                     | 48.6 | 0.276                          |
| Headache severity on day 6    | Reduced severity | 69                   | 48.6 | 72                     | 50.7 | 0.406                          |
| Headache severity on day 7    | Reduced severity | 68                   | 47.9 | 75                     | 52.8 | 0.238                          |
| Headache severity on day 8    | Reduced severity | 75                   | 52.8 | 80                     | 56.3 | 0.317                          |
| Headache severity on day 9    | Reduced severity | 76                   | 53.5 | 80                     | 56.3 | 0.360                          |
| Headache severity on day 10   | Reduced severity | 73                   | 51.4 | 83                     | 58.5 | 0.142                          |
| Headache severity on day 11   | Reduced severity | 78                   | 54.9 | 83                     | 58.5 | 0.316                          |
| Headache severity on day 12   | Reduced severity | 78                   | 54.9 | 84                     | 59.2 | 0.275                          |
| Headache severity on day 13   | Reduced severity | 80                   | 56.3 | 87                     | 61.3 | 0.235                          |
| Headache severity on day 14   | Reduced severity | 80                   | 56.3 | 89                     | 62.7 | 0.167                          |
| Headache severity on day 15   | Reduced severity | 80                   | 56.3 | 89                     | 62.7 | 0.167                          |
| Sore throat severity on day 2 | Reduced severity | 15                   | 10.6 | 12                     | 8.5  | 0.343                          |
| Sore throat severity on day 3 | Reduced severity | 31                   | 21.8 | 27                     | 19.0 | 0.330                          |
| Sore throat severity on day 4 | Reduced severity | 42                   | 29.6 | 35                     | 24.6 | 0.212                          |
| Sore throat severity on day 5 | Reduced severity | 42                   | 29.6 | 42                     | 29.6 | 0.552                          |
| Sore throat severity on day 6 | Reduced severity | 44                   | 31.0 | 45                     | 31.7 | 0.500                          |

| Variable                       | Category         | Placebo<br>(N = 142) |      | Enisamium<br>(N = 142) |      | P-<br>value<br>(one-<br>sided) |
|--------------------------------|------------------|----------------------|------|------------------------|------|--------------------------------|
|                                |                  | <i>n</i>             | %    | <i>n</i>               | %    |                                |
| Sore throat severity on day 7  | Reduced severity | 49                   | 34.5 | 49                     | 34.5 | 0.550                          |
| Sore throat severity on day 8  | Reduced severity | 52                   | 36.6 | 49                     | 34.5 | 0.402                          |
| Sore throat severity on day 9  | Reduced severity | 52                   | 36.6 | 50                     | 35.2 | 0.451                          |
| Sore throat severity on day 10 | Reduced severity | 54                   | 38.0 | 53                     | 37.3 | 0.500                          |
| Sore throat severity on day 11 | Reduced severity | 55                   | 38.7 | 53                     | 37.3 | 0.451                          |
| Sore throat severity on day 12 | Reduced severity | 55                   | 38.7 | 55                     | 38.7 | 0.548                          |
| Sore throat severity on day 13 | Reduced severity | 55                   | 38.7 | 56                     | 39.4 | 0.500                          |
| Sore throat severity on day 14 | Reduced severity | 55                   | 38.7 | 57                     | 40.1 | 0.452                          |
| Sore throat severity on day 15 | Reduced severity | 56                   | 39.4 | 57                     | 40.1 | 0.500                          |
| Diarrhea severity on day 2     | Reduced severity | 10                   | 7.0  | 8                      | 5.6  | 0.404                          |
| Diarrhea severity on day 3     | Reduced severity | 15                   | 10.6 | 15                     | 10.6 | 0.578                          |
| Diarrhea severity on day 4     | Reduced severity | 16                   | 11.3 | 16                     | 11.3 | 0.574                          |
| Diarrhea severity on day 5     | Reduced severity | 18                   | 12.7 | 13                     | 9.2  | 0.224                          |
| Diarrhea severity on day 6     | Reduced severity | 20                   | 14.1 | 18                     | 12.7 | 0.431                          |
| Diarrhea severity on day 7     | Reduced severity | 19                   | 13.4 | 17                     | 12.0 | 0.429                          |
| Diarrhea severity on day 8     | Reduced severity | 19                   | 13.4 | 17                     | 12.0 | 0.429                          |
| Diarrhea severity on day 9     | Reduced severity | 19                   | 13.4 | 20                     | 14.1 | 0.500                          |
| Diarrhea severity on day 10    | Reduced severity | 19                   | 13.4 | 19                     | 13.4 | 0.569                          |
| Diarrhea severity on day 11    | Reduced severity | 19                   | 13.4 | 19                     | 13.4 | 0.569                          |
| Diarrhea severity on day 12    | Reduced severity | 20                   | 14.1 | 19                     | 13.4 | 0.500                          |
| Diarrhea severity on day 13    | Reduced severity | 21                   | 14.8 | 19                     | 13.4 | 0.432                          |
| Diarrhea severity on day 14    | Reduced severity | 22                   | 15.5 | 19                     | 13.4 | 0.368                          |
| Diarrhea severity on day 15    | Reduced severity | 22                   | 15.5 | 19                     | 13.4 | 0.368                          |
| Myalgia severity on day 2      | Reduced severity | 29                   | 20.4 | 25                     | 17.6 | 0.325                          |
| Myalgia severity on day 3      | Reduced severity | 52                   | 36.6 | 51                     | 35.9 | 0.500                          |
| Myalgia severity on day 4      | Reduced severity | 80                   | 56.3 | 69                     | 48.6 | 0.117                          |
| Myalgia severity on day 5      | Reduced severity | 85                   | 59.9 | 82                     | 57.7 | 0.405                          |
| Myalgia severity on day 6      | Reduced severity | 92                   | 64.8 | 85                     | 59.9 | 0.231                          |
| Myalgia severity on day 7      | Reduced severity | 95                   | 66.9 | 90                     | 63.4 | 0.309                          |
| Myalgia severity on day 8      | Reduced severity | 96                   | 67.6 | 92                     | 64.8 | 0.353                          |
| Myalgia severity on day 9      | Reduced severity | 97                   | 68.3 | 93                     | 65.5 | 0.353                          |
| Myalgia severity on day 10     | Reduced severity | 96                   | 67.6 | 94                     | 66.2 | 0.450                          |
| Myalgia severity on day 11     | Reduced severity | 98                   | 69.0 | 97                     | 68.3 | 0.500                          |
| Myalgia severity on day 12     | Reduced severity | 97                   | 68.3 | 97                     | 68.3 | 0.551                          |
| Myalgia severity on day 13     | Reduced severity | 97                   | 68.3 | 98                     | 69.0 | 0.500                          |
| Myalgia severity on day 14     | Reduced severity | 98                   | 69.0 | 98                     | 69.0 | 0.551                          |
| Myalgia severity on day 15     | Reduced severity | 98                   | 69.0 | 98                     | 69.0 | 0.551                          |

\*The severity of symptoms was scored on a verbal rating scale (VRS-4): 0 scores – none / not present; 1 score – mild; 2 scores – moderate; 3 scores – severe.
